# Supplementary material for: DROSHA-Dependent AIM2 Inflammasome Activation Contributes to Lung Inflammation during Idiopathic Pulmonary Fibrosis
Source: PubMed Central journal article supplement (PMC6721825; doi:10.3390/cells8080938), 2019-08-20
Supplement: cells-08-00938-s001.pdf [file cells-08-00938-s001.pdf]

## **Supplemental information**

### **DROSHA-dependent AIM2 inflammasome activation contributes to lung inflammation during idiopathic pulmonary fibrosis.**

Soo Jung Cho<sup>1,2</sup>, Kyoung Sook Hong<sup>1,2,3</sup>, Ji Hun Jeong<sup>4</sup>, Mihye Lee<sup>4</sup>, Augustine M. K. Choi<sup>1,2</sup>, Heather W. Stout-Delgado<sup>1,2</sup> and Jong-Seok Moon<sup>4\*</sup>

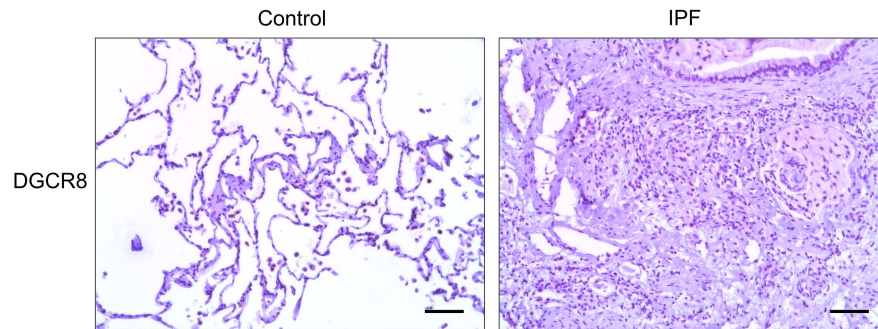

**Supplemental Figure S1. DGCR8 expression is comparable in lung tissues from patients with IPF and healthy subject.** Representative immunohistochemistry image of DGCR8 in lung tissues from patients with IPF (IPF ) or healthy control (Control). Scale bar, 50  $\mu$ M.

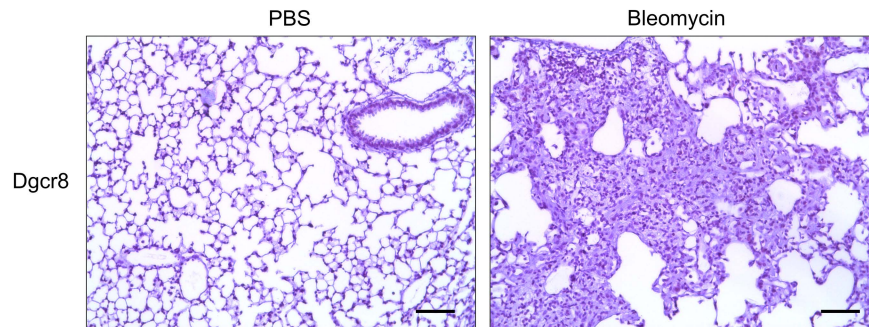

**Supplemental Figure S2. DGCR8 expression is comparable in lung tissues during bleomycin-induced lung injury.** Representative immunohistochemistry image of DGCR8 in lung tissues from WT mice were exposed to PBS or bleomycin via oropharyngeal aspiration. Scale bar, 50  $\mu$ M.

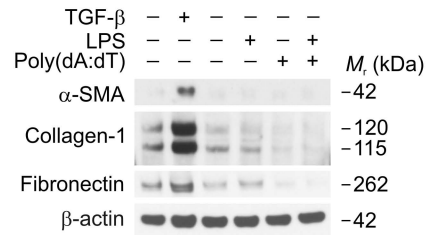

**Supplemental Figure S3. LPS and poly(dA:dT) did not change the activation of fibroblasts.** Representative immunoblot analysis for  $\alpha$ -SMA, collagen-1 and fibronectin levels from mouse primary lung fibroblasts were treated with TGF- $\beta$  (20 ng/ml, 24h), LPS or poly(dA:dT). For immunoblots,  $\beta$ -actin was used as loading control.
